# Supplementary material for: Blood Biomarkers as Prognostic Indicators for Neurological Injury in COVID-19 Patients: A Systematic Review and Meta-Analysis
Source: MDPI journal article supplement (doi:10.3390/ijms242115738), 2023-10-30
Supplement: s1 [file s1]

## Supplementary Materials

**Table S1.** Risk of bias assessment for cross-sectional studies by the Newcastle-Ottawa-Scale.

| Authors*                     | Selection          |             |                   | Comparability                       |   | Outcome               |                  | NOS** score | Risk of bias |
|------------------------------|--------------------|-------------|-------------------|-------------------------------------|---|-----------------------|------------------|-------------|--------------|
|                              | Representativeness | Sample size | Non-response rate | Ascertainment of the screening tool |   | Assessment of outcome | Statistical test |             |              |
| Sahin et al. 2022 [21]       | 1                  | 0           | 0                 | 2                                   | 1 | 2                     | 1                | 7           | Low          |
| Plantone et al. 2022 [18]    | 1                  | 0           | 0                 | 2                                   | 1 | 2                     | 1                | 7           | Low          |
| Kanberg et al. 2020 [17]     | 1                  | 0           | 1                 | 2                                   | 1 | 2                     | 1                | 8           | Low          |
| Eden et al. 2022 [57]        | 1                  | 0           | 0                 | 2                                   | 1 | 2                     | 1                | 7           | Low          |
| Havdal et al. 2022 [20]      | 1                  | 0           | 1                 | 2                                   | 1 | 2                     | 1                | 8           | Low          |
| Lennol et al. 2023 [64]      | 1                  | 0           | 1                 | 2                                   | 1 | 2                     | 1                | 8           | Low          |
| Ziff et al. 2022 [58]        | 1                  | 0           | 1                 | 2                                   | 1 | 2                     | 1                | 8           | Low          |
| Zingaropoli et al. 2022 [27] | 1                  | 0           | 1                 | 2                                   | 1 | 2                     | 1                | 8           | Low          |
| Verde et al. 2022 [25]       | 1                  | 0           | 1                 | 2                                   | 0 | 2                     | 1                | 7           | Low          |
| Geis et al. 2021 [32]        | 1                  | 1           | 1                 | 2                                   | 1 | 2                     | 1                | 8           | Low          |
| Prudencio et al. 2021 [19]   | 1                  | 0           | 1                 | 2                                   | 1 | 2                     | 1                | 8           | Low          |
| Hay et al. 2021 [61]         | 1                  | 0           | 0                 | 2                                   | 1 | 2                     | 1                | 7           | Low          |
| Cooper et al. 2020 [65]      | 1                  | 0           | 1                 | 2                                   | 1 | 2                     | 1                | 8           | Low          |
| Barbara et al. 2022 [62]     | 1                  | 0           | 1                 | 2                                   | 0 | 2                     | 1                | 7           | Low          |

**Table S2.** Risk of bias assessment for cohort studies by the Newcastle-Ottawa-Scale.

| Authors*                 | Selection          |                              |                           | Comparability                                             |   | Outcome               |                   |                       | NOS score | Risk of bias |
|--------------------------|--------------------|------------------------------|---------------------------|-----------------------------------------------------------|---|-----------------------|-------------------|-----------------------|-----------|--------------|
|                          | Representativeness | Selection of the non-exposed | Ascertainment of exposure | outcome of interest was not present at the start of study |   | Assessment of outcome | Time of follow-up | Adequacy of follow up |           |              |
| Bonetto et al. 2022 [56] | 1                  | 1                            | 1                         | 1                                                         | 1 | 2                     | 0                 | 1                     | 8         | Low          |
| Needham et al. 2021 [59] | 1                  | 0                            | 1                         | 1                                                         | 1 | 1                     | 1                 | 1                     | 7         | Low          |
| Ameres et al. 2020 [63]  | 1                  | 0                            | 1                         | 1                                                         | 1 | 1                     | 1                 | 1                     | 7         | Low          |

**Table S3.** Risk of bias assessment for case-control studies by the Newcastle-Ottawa-Scale.

| Authors *                 | Selection                       |                                 |                       |                        | Comparability | Exposure                  |                                                     |                   | NOS score | Risk of bias |
|---------------------------|---------------------------------|---------------------------------|-----------------------|------------------------|---------------|---------------------------|-----------------------------------------------------|-------------------|-----------|--------------|
|                           | Is the case definition adequate | Representativeness of the cases | Selection of Controls | Definition of Controls |               | Ascertainment of exposure | Same method of ascertainment for cases and controls | Non-Response rate |           |              |
| Kanberg et al 2021. [35]  | 1                               | 1                               | 0                     | 1                      | 1             | 1                         | 1                                                   | 1                 | 7         | Low          |
| Paterson et al. 2021 [60] | 1                               | 1                               | 0                     | 0                      | 1             | 2                         | 1                                                   | 1                 | 7         | Low          |
| Guasp et al. 2022 [26]    | 1                               | 1                               | 0                     | 1                      | 1             | 2                         | 1                                                   | 1                 | 8         | Low          |
| Sahin et al,2022 [37]     | 1                               | 1                               | 0                     | 0                      | 2             | 1                         | 1                                                   | 1                 | 7         | Low          |

\*The reference lists are available in the main text. \*\* Newcastle-Ottawa-Scale

**Note:** Studies that received a total score of 8 or 7 points were categorized as having a low risk of bias or high quality. Those scoring 6 points were considered to have a medium risk of bias or moderate quality, while studies with a score of 5 points or less were regarded as having a high risk of bias or low quality. In terms of selection, studies were assessed as having a low, medium, or high risk of bias based on scores of 3, 1-2, or 0 points, respectively. For comparability, studies were evaluated as having a low, medium, or high risk of bias depending

on scores of 2, 1, or 0 points, respectively. Regarding outcome, studies were categorized as having a low, medium, or high risk of bias based on scores of 3, 2, or 1 point, respectively.
